# Supplementary material
Source: PubMed Central journal article supplement (PMC5533087)
Supplement: NIHMS883906-supplement-005105_-_Supplemental_Material.pdf [file NIHMS883906-supplement-005105_-_Supplemental_Material.pdf]

# SUPPLEMENTAL MATERIAL

## Supplemental Figure S1: The ECGI Procedure

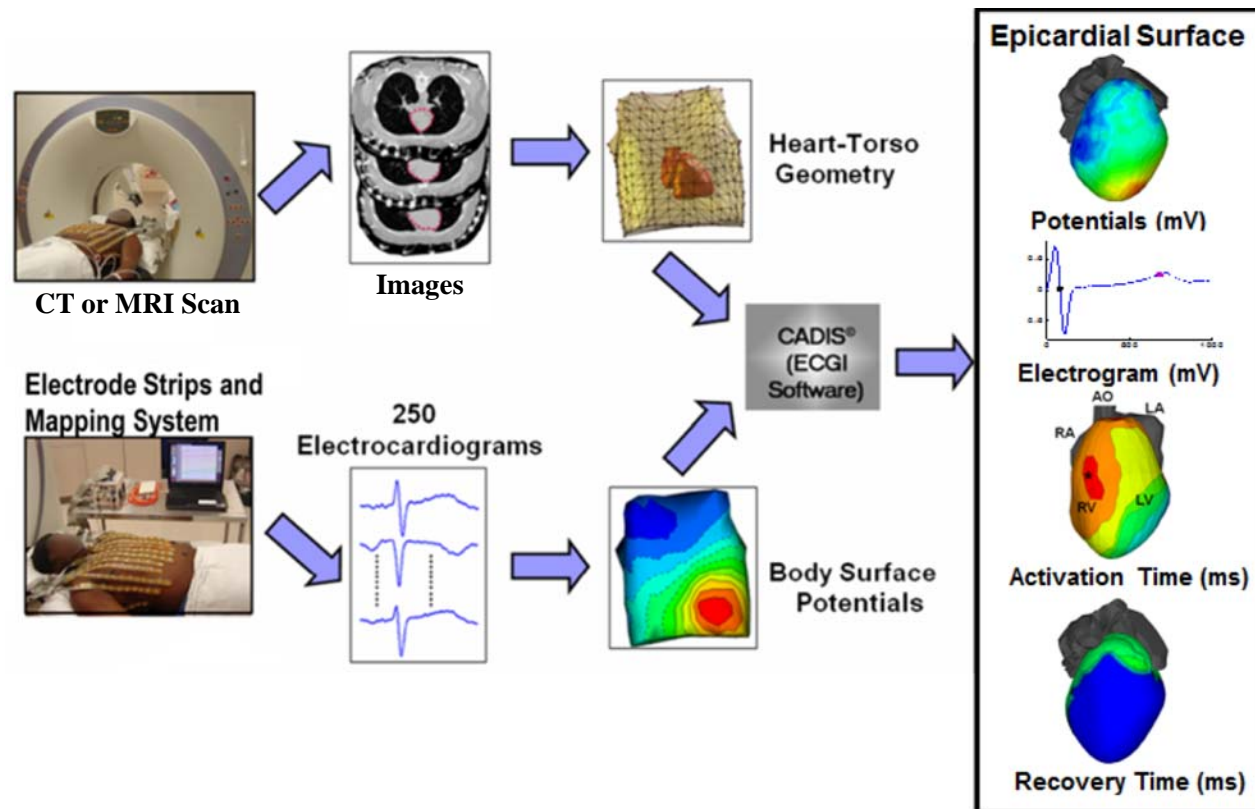

Schematic diagram of the ECGI procedure. A computed tomography (CT) or magnetic resonance imaging (MRI) scan provides the geometry of the epicardial surface and the locations of the recording electrodes on the body surface in the same coordinate system (top). The body surface potential distribution is obtained from 256 simultaneously recorded electrocardiograms (bottom). Solving the inverse problem (middle gray box) yields epicardial potentials and electrograms, from which activation times, recovery times, and other parameters of interest are derived (right frame).

## Supplemental Figure S2: Activation Time, Recovery Time, and Activation-Recovery Intervals

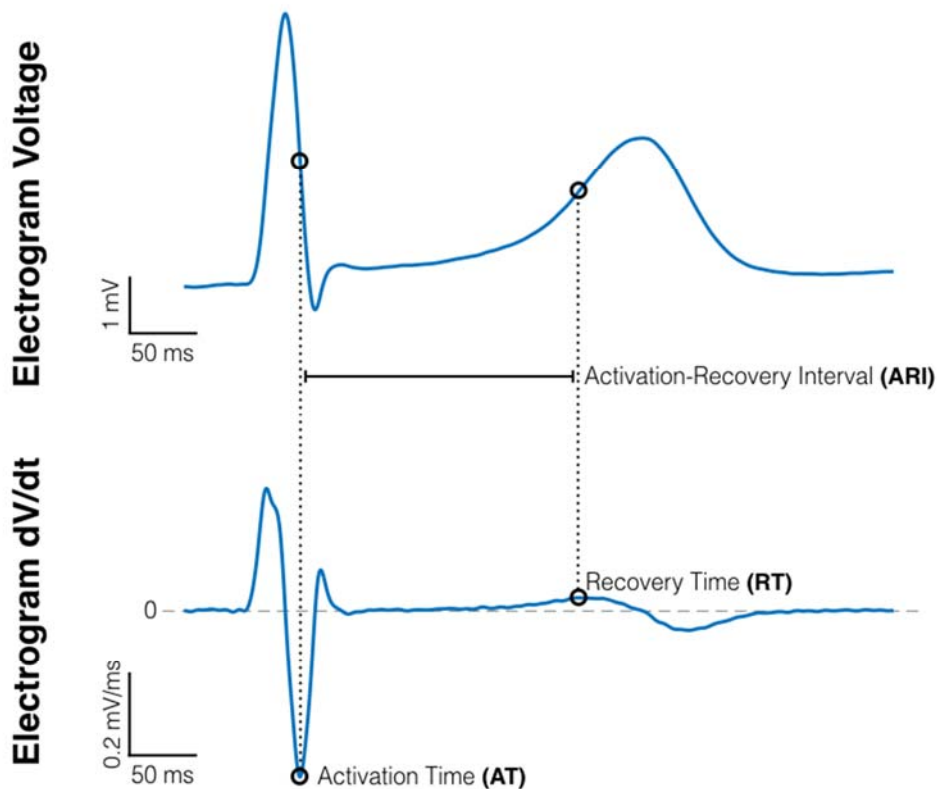

Diagram of unipolar electrogram (EGM) Activation Time (AT), Recovery Time (RT), and Activation-Recovery Interval (ARI). Temporal derivatives (bottom) were computed from EGMs (top). ATs were computed as the time of steepest negative time-derivative of voltage ( $-dV/dt_{\max}$ ) in the local QRS complex. Recovery Times were computed as the time of steepest positive time-derivative ( $dV/dt_{\max}$ ) during the T-wave. To eliminate noise effects from RT values, T-waves were lowpass-filtered using a 30 Hz Butterworth filter before determining RT. ARIs (a surrogate for local action potential duration) were computed as the difference between RT and AT.

EGM: electrogram  
AT: Activation Time  
RT: Recovery Time  
ARI: Activation-Recovery Interval

### Supplemental Figure S3: Electrogram Fractionation

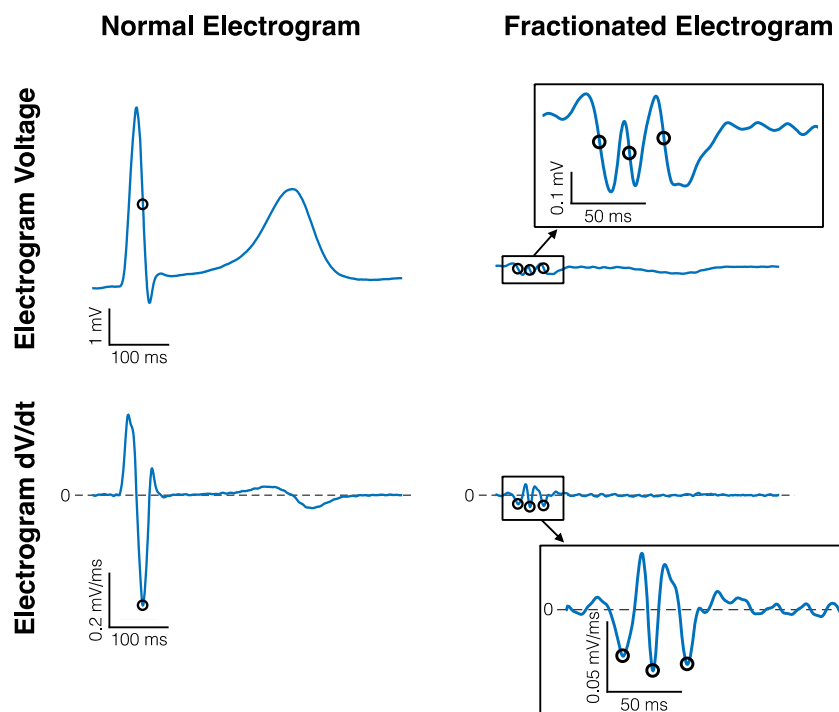

EGM: electrogram

Diagram of electrogram (EGM) deflections for a normal EGM (left) and a low-amplitude fractionated EGM (right, shown on the same scale). The normal EGM had a single deflection (left, circle) while the fractionated EGM had 3 deflections (right, circles). Insets (large box) show fractionated EGM QRS voltage and  $dV/dt$  on enlarged scale. Fractionation was quantified by counting the number of steep downward deflections between the QRS onset and the start of the T-wave. Temporal derivatives ( $dV/dt$ , bottom) were computed from unipolar EGMs (top). Downward deflections were regions of EGMs with a negative  $dV/dt$ . Multiple deflections occurred when there was a positive  $dV/dt$  between downward deflections. The thresholds for steep downward deflections were:

- 1) Deflection peak-to-peak voltage amplitude  $\geq 10\%$  of the EGM peak-to-peak voltage amplitude
- 2) Deflection  $-dV/dt \geq 70\%$  of the EGM maximum  $-dV/dt$

Additionally, both values were required to be  $\geq 5\%$  of the corresponding median values for all EGMs to prevent the detection of noise in flat EGMs as fractionation.

### Supplemental Table S1: Manuscript Abbreviations

| Abbreviation | Meaning                                         |
|--------------|-------------------------------------------------|
| ARVC         | Arrhythmogenic Right Ventricular Cardiomyopathy |
| RV           | Right Ventricle                                 |
| LV           | Left Ventricle                                  |
| EP           | Electrophysiological                            |
| ICD          | Implantable Cardioverter Defibrillator          |
| ECGI         | Electrocardiographic Imaging                    |
| MRI          | Magnetic Resonance Imaging                      |
| CMR          | Cardiac Magnetic Resonance                      |
| LGE          | Late Gadolinium Enhancement                     |
| ECG          | Electrocardiogram                               |
| HR           | Heart Rate                                      |
| EGM          | Electrogram                                     |
| PVC          | Premature Ventricular Contraction               |
| AT           | Activation Time                                 |
| RT           | Recovery Time                                   |
| ARI          | Activation-Recovery Interval                    |

**Supplemental Table S2: Patient Clinical Characteristics (zoom to 200% or larger for clear viewing)**

| Demographics |     |        | Genetics |                                  | RV Morphological Abnormalities |          |          |             |         | LV Morphological Abnormalities |          |          |             |         | Scar |     |        | ECG Abnormalities |         |          |            | Arrhythmias   |                  |                      |                    |                | Task Force Criteria |       |
|--------------|-----|--------|----------|----------------------------------|--------------------------------|----------|----------|-------------|---------|--------------------------------|----------|----------|-------------|---------|------|-----|--------|-------------------|---------|----------|------------|---------------|------------------|----------------------|--------------------|----------------|---------------------|-------|
| ID           | Age | Gender | Gene     | Mutation                         | Wall                           |          | Systolic |             |         | Wall                           |          | Systolic |             |         | RV   | LV  | Biopsy | T wave            | Epsilon | Positive | Terminal S | NSVT/SVT      |                  | >500 VE's per 24 hrs | VT Study Inducible | Family History | Major               | Minor |
|              |     |        |          |                                  | Dilation                       | Thinning | RWMA     | Dysfunction | Anurysm | Dilation                       | Thinning | RWMA     | Dysfunction | Anurysm | LGE  | LGE |        | Inversion         | Waves   | SAECG    | wave >55ms | superior axis | or inferior axis |                      |                    |                |                     |       |
| 1            | 59  | M      | JUP      | JUP - c.2039G>A, W680X           | +                              | -        | -        | -           | -       | -                              | -        | -        | -           | -       | +    | -   | -      | -                 | -       | -        | -          | -             | -                | -                    | Major              | 1              | 1                   |       |
| 2            | 63  | M      | PKP2     | c.148_151delACAG, p.S50fsX110    | +                              | -        | +        | -           | -       | -                              | -        | -        | -           | -       | -    | -   | -      | -                 | +       | -        | -          | -             | -                | -                    | Major              | 1              | 3                   |       |
| 3            | 54  | F      | PKP2     | c.1799delA, p.V600fsX655         | +                              | -        | +        | -           | -       | -                              | -        | +        | -           | -       | -    | -   | -      | V1-3              | -       | -        | -          | -             | +                | +                    | Major              | 2              | 3                   |       |
| 4            | 44  | M      | DSP      | c.817_818insA, p.Q273fsX288      | -                              | -        | -        | -           | -       | -                              | -        | -        | -           | -       | -    | -   | -      | -                 | +       | +        | -          | -             | +                | -                    | Major              | 1              | 3                   |       |
| 5            | 55  | M      | DSP      | c.G4477T:p.E1493X                | +                              | -        | -        | -           | -       | -                              | -        | -        | -           | -       | +    | -   | -      | -                 | -       | +        | -          | -             | -                | +                    | +                  | Major          | 1                   | 5     |
| 6            | 63  | M      | PKP2     | c.2197_2202delinsG, p.A733fsX740 | +                              | +        | +        | +           | -       | -                              | -        | +        | +           | -       | -    | +   | -      | +                 | -       | -        | +          | -             | -                | +                    | Minor              | 3              | 3                   |       |
| 7            | 59  | M      | DSP      | c.3045delG, p.S1015fsX1017       | +                              | -        | -        | -           | -       | -                              | -        | +        | +           | -       | -    | +   | -      | V1-5              | -       | -        | -          | -             | +                | +                    | Minor              | 1              | 3                   |       |
| 8            | 69  | F      | PKP2     | c.2146-1G>C                      | -                              | -        | -        | -           | -       | -                              | -        | -        | -           | -       | -    | -   | -      | -                 | -       | -        | -          | -             | +                | +                    | Minor              | 0              | 2                   |       |
| 9            | 61  | M      | DSP      | c.G4477T:p.E1493X                | -                              | -        | -        | -           | -       | -                              | -        | -        | -           | -       | -    | +   | -      | V5-6              | -       | -        | -          | -             | +                | +                    | Major              | 1              | 2                   |       |
| 10           | 41  | F      | DSP      | c.C5178A:p.N1726K*               | -                              | -        | -        | -           | -       | -                              | -        | -        | -           | -       | -    | -   | -      | V1-4              | -       | -        | -          | -             | -                | -                    | Minor              | 1              | 1                   |       |
| 11           | 49  | F      | PKP2     | c.2489+1G>A                      | +                              | -        | +        | -           | -       | -                              | -        | -        | -           | -       | +    | -   | V1-4   | -                 | +       | -        | -          | -             | -                | +                    | Major              | 3              | 2                   |       |
| 12           | 60  | M      | DSG      | c.G3C:p.M11                      | +                              | -        | +        | -           | -       | -                              | -        | +        | +           | -       | -    | -   | V5-6   | -                 | +       | -        | -          | -             | -                | +                    | Major              | 3              | 2                   |       |
| 13           | 26  | M      | PKP2     | c.2489+1G>A                      | -                              | -        | -        | -           | -       | -                              | -        | -        | -           | -       | -    | +   | -      | -                 | -       | +        | +          | -             | -                | -                    | Minor              | 0              | 3                   |       |
| 14           | 66  | M      | PKP2     | c.2197_2202delinsG, p.A733fsX740 | +                              | -        | +        | +           | -       | -                              | -        | +        | +           | -       | -    | +   | -      | V1-3              | -       | -        | +          | -             | -                | -                    | Major              | 2              | 1                   |       |
| 15           | 54  | M      | PKP2     | c.2146-1G>C                      | -                              | -        | +        | -           | +       | -                              | -        | -        | -           | -       | +    | -   | V1-4   | -                 | -       | -        | -          | -             | -                | -                    | Major              | 2              | 0                   |       |
| 16           | 74  | M      | DSG      | c.G3C:p.M11                      | -                              | -        | +        | -           | -       | -                              | -        | -        | -           | -       | -    | -   | -      | +                 | +       | -        | -          | -             | +                | Minor                | 1                  | 3              |                     |       |
| 17           | 24  | M      | DSP      | c.C3337T:p.R1113X                | -                              | -        | -        | -           | -       | -                              | -        | -        | -           | -       | -    | +   | -      | -                 | -       | -        | -          | -             | -                | -                    | Major              | 1              | 0                   |       |
| 18           | 54  | M      | -        | Desmosomal gene negative         | -                              | -        | +        | -           | +       | -                              | -        | +        | +           | -       | +    | +   | V1-6   | -                 | -       | -        | -          | -             | -                | +                    | None               | 2              | 2                   |       |
| 19           | 39  | M      | -        | Desmosomal gene negative         | +                              | -        | +        | -           | -       | -                              | +        | +        | -           | -       | +    | -   | V1-4   | -                 | -       | -        | -          | -             | +                | +                    | None               | 2              | 2                   |       |
| 20           | 75  | M      | -        | Desmosomal gene negative         | -                              | -        | +        | +           | -       | -                              | -        | +        | +           | -       | +    | +   | V1-5   | -                 | -       | -        | -          | +             | -                | +                    | None               | 2              | 3                   |       |

Clinical characteristics of ARVC study population. Asterisk indicates gene variant of unknown significance.

JUP: Plakoglobin

PKP2: Plakophilin-2

DSP: Desmoplakin

DSG: Desmoglein

RWMA: Regional Wall Motion Abnormality

LV: Left Ventricular

RV: Right Ventricular

LGE: Late Gadolinium Enhancement

SAECG: Signal Averaged Electrocardiogram

NSVT: Non-Sustained Ventricular Tachycardia

SVT: Sustained Ventricular Tachycardia

VE: Ventricular Extrasystole

VT: Ventricular Tachycardia

### Supplemental Table S3: Holter PVC Findings

| ID | Age | Gender | PVC Count | Monomorphic/Polymorphic | Morphology |
|----|-----|--------|-----------|-------------------------|------------|
| 1  | 59  | M      | 59        | Monomorphic             | LBBB       |
| 2  | 63  | M      | 620       | Polymorphic             | LBBB+RBBB  |
| 3  | 54  | F      | 1028      | Monomorphic             | LBBB       |
| 4  | 44  | M      | 10        | Monomorphic             | LBBB       |
| 5  | 55  | M      | 1000      | Monomorphic             | LBBB       |
| 6  | 63  | M      | 2364      | Monomorphic             | LBBB       |
| 7  | 59  | M      | 1111      | Polymorphic             | LBBB+RBBB  |
| 8  | 69  | F      | 784       | Monomorphic             | LBBB       |
| 9  | 61  | M      | >3000     | Monomorphic             | LBBB       |
| 10 | 41  | F      | 56        | Monomorphic             | LBBB       |
| 11 | 49  | F      | 642       | Monomorphic             | LBBB       |
| 12 | 60  | M      | 681       | Polymorphic             | LBBB+RBBB  |
| 13 | 26  | M      | 52        | Monomorphic             | LBBB       |
| 14 | 66  | M      | 26        | Monomorphic             | LBBB       |
| 15 | 54  | M      | 38        | Monomorphic             | LBBB       |
| 16 | 74  | M      | 1056      | Monomorphic             | LBBB       |
| 17 | 24  | M      | 56        | Monomorphic             | LBBB       |
| 18 | 54  | M      | 3496      | Monomorphic             | LBBB       |
| 19 | 39  | M      | 890       | Monomorphic             | LBBB       |
| 20 | 75  | M      | >3000     | Monomorphic             | LBBB       |

Summary of 24-hour Holter findings from patient clinical records.

LBBB: Left bundle branch block morphology

RBBB: Right bundle branch block morphology

### Supplemental Table S4: ARVC–Control Group Comparisons

| Parameter                                                       | Control |      |      | ARVC   |      |      | P     | Significance |
|-----------------------------------------------------------------|---------|------|------|--------|------|------|-------|--------------|
|                                                                 | Median  | Q1   | Q3   | Median | Q1   | Q3   |       |              |
| Total Activation Time (msec)                                    | 42      | 36   | 47   | 52     | 44   | 64   | 0.007 | **           |
| Total Recovery Time (msec)                                      | 134     | 126  | 152  | 129    | 120  | 146  | 0.273 |              |
| Mean Epicardial ARI (msec, Fridericia Rate-Correction)          | 241     | 230  | 262  | 275    | 237  | 300  | 0.014 | *            |
| Mean Epicardial EGM Amplitude (mV)                              | 2.28    | 2.00 | 3.03 | 2.58   | 1.69 | 2.96 | 0.735 |              |
| Mean Deflections Per-Electrogram                                | 1.06    | 1.03 | 1.06 | 1.09   | 1.03 | 1.18 | 0.086 |              |
| Mean Epicardial Activation Time Gradient (ms/mm)                | 0.24    | 0.21 | 0.28 | 0.31   | 0.26 | 0.37 | 0.018 | *            |
| Mean Epicardial Recovery Time Gradient (ms/mm)                  | 1.06    | 0.95 | 1.22 | 0.93   | 0.85 | 1.05 | 0.060 |              |
| Mean Epicardial ARI Gradient (msec, Fridericia Rate-Correction) | 1.17    | 1.07 | 1.38 | 1.21   | 1.05 | 1.48 | 1.000 |              |

Median, quartiles, and Wilcoxon rank sum comparison of ECGI EP parameters in healthy adults (Controls) and ARVC patients. Highlighted rows (yellow) indicate statistically significant differences between Control and ARVC groups.

Significance levels:

\*\*\* p < 0.001

\*\* p < 0.01

\* p < 0.05

Q1: First Quartile

Q3: Third Quartile

**Supplemental Table S5: Mean Fridericia-Corrected Epicardial ARI (msec) in Controls and ARVC Patients with and without T-Wave Inversion**

| Controls |     |     |     |     | ARVC: T-Wave Inversion |     |     |     |     | ARVC: No T-Wave Inversion |     |     |     |     |
|----------|-----|-----|-----|-----|------------------------|-----|-----|-----|-----|---------------------------|-----|-----|-----|-----|
| Median   | Q1  | Q3  | Min | Max | Median                 | Q1  | Q3  | Min | Max | Median                    | Q1  | Q3  | Min | Max |
| 241      | 230 | 262 | 206 | 274 | 300                    | 269 | 313 | 218 | 330 | 238                       | 231 | 262 | 226 | 285 |

Median, quartiles, Range, and Wilcoxon rank sum comparison of resting ARI (Fridericia rate-correction applied) in Controls and ARVC patients with and without T-Wave Inversion. Group difference ARVC with T-Wave Inversion is significantly different than controls at  $p < 0.001$  level and ARVC without T-Wave Inversion at  $p < 0.01$  level.

Q1: First Quartile

Q3: Third Quartile

Min: Minimum value observed in group

Max: Maximum value observed in group



### Supplemental Table S6: Exercise Changes in ARVC Parameters

| Parameter                                                       | Resting HR |      |      | Elevated HR |      |      | P       | Significance |
|-----------------------------------------------------------------|------------|------|------|-------------|------|------|---------|--------------|
|                                                                 | Median     | Q1   | Q3   | Median      | Q1   | Q3   |         |              |
| Total Activation Time (msec)                                    | 53         | 46   | 66   | 57          | 47   | 66   | 0.658   |              |
| Total Recovery Time (msec)                                      | 130        | 120  | 150  | 106         | 91   | 120  | 0.002   | **           |
| Mean Epicardial ARI (msec, uncorrected for HR)                  | 275        | 235  | 313  | 186         | 173  | 203  | < 0.001 | ***          |
| Mean Epicardial EGM Amplitude (mV)                              | 2.57       | 1.60 | 2.94 | 2.08        | 1.28 | 2.50 | < 0.001 | ***          |
| Mean Deflections Per-Electrogram                                | 1.09       | 1.03 | 1.18 | 1.09        | 1.05 | 1.22 | 0.872   |              |
| Mean Epicardial Activation Time Gradient (ms/mm)                | 0.33       | 0.26 | 0.38 | 0.30        | 0.27 | 0.35 | 0.260   |              |
| Mean Epicardial Recovery Time Gradient (ms/mm)                  | 0.94       | 0.87 | 1.06 | 0.70        | 0.60 | 0.88 | 0.007   | **           |
| Mean Epicardial ARI Gradient (msec, Fridericia Rate-Correction) | 1.22       | 1.07 | 1.49 | 1.12        | 1.01 | 1.38 | 0.687   |              |

Median, quartiles, and Wilcoxon signed-rank comparison of ECGI EP parameters in ARVC patients at Resting HR and Elevated HR after exercise. Highlighted rows (yellow) indicate statistically significant differences between Control and ARVC groups.

Significance levels:

- \*\*\* p < 0.001
- \*\* p < 0.01
- \* p < 0.05

Q1: First Quartile

Q3: Third Quartile

### Supplemental Table S7: Correlation of EP Substrate to LV Late Gadolinium Enhancement

| Parameter               | CC    | P       | Significance |
|-------------------------|-------|---------|--------------|
| EGM Amplitude           | -0.42 | < 0.001 | ***          |
| Deflections Per-EGM     | 0.52  | < 0.001 | ***          |
| AT Spatial Gradient     | 0.24  | 0.001   | **           |
| Resting ARI             | 0.29  | < 0.001 | ***          |
| Exercise ARI            | 0.10  | 0.190   |              |
| RT Spatial Gradient     | -0.09 | 0.232   |              |
| ARI Spatial Gradient    | 0.05  | 0.485   |              |
| Exercise ARI Shortening | 0.31  | < 0.001 | ***          |

Spearman correlation coefficients of LV LGE and EP substrate parameters. Highlighted rows (yellow) indicate statistically significant correlations between LV LGE and EP substrate parameters.

Significance levels:

\*\*\* p < 0.001

\*\* p < 0.01

\* p < 0.05

**Supplemental Table S8: Correlation of EP Substrate to RV Late Gadolinium Enhancement**

| Parameter               | CC    | P       | Significance |
|-------------------------|-------|---------|--------------|
| EGM Amplitude           | -0.02 | 0.755   |              |
| Deflections Per-EGM     | -0.05 | 0.472   |              |
| AT Spatial Gradient     | -0.15 | 0.051   |              |
| Resting ARI             | 0.30  | < 0.001 | ***          |
| Exercise ARI            | 0.17  | 0.027   | *            |
| RT Spatial Gradient     | -0.05 | 0.502   |              |
| ARI Spatial Gradient    | -0.10 | 0.197   |              |
| Exercise ARI Shortening | 0.36  | < 0.001 | ***          |

Spearman correlation coefficients of RV LGE and EP substrate parameters. Highlighted rows (yellow) indicate statistically significant correlations between RV LGE and EP substrate parameters.

Significance levels:

\*\*\* p < 0.001

\*\* p < 0.01

\* p < 0.05

### Supplemental Table S9: Correlation of LGE and EP Substrate with Regional Rate of Ventricular Ectopy

| Parameter               | CC    | P       | Significance |
|-------------------------|-------|---------|--------------|
| EGM Amplitude           | -0.21 | < 0.001 | ***          |
| Deflections Per-EGM     | 0.20  | < 0.001 | ***          |
| AT Spatial Gradient     | 0.04  | 0.457   |              |
| Resting ARI             | 0.35  | < 0.001 | ***          |
| Exercise ARI            | 0.28  | < 0.001 | ***          |
| RT Spatial Gradient     | -0.06 | 0.232   |              |
| ARI Spatial Gradient    | 0.00  | 0.943   |              |
| Exercise ARI Shortening | 0.30  | < 0.001 | ***          |
| LV LGE                  | 0.50  | < 0.001 | ***          |
| RV LGE                  | 0.35  | < 0.001 | ***          |

Spearman correlation coefficients of PVC rate within anatomical regions and EP substrate parameters and LGE. Highlighted rows (yellow) indicate statistically significant correlations between PVC Rate and substrate parameters.

Significance levels:

\*\*\* p < 0.001

\*\* p < 0.01

\* p < 0.05

## Supplemental References (ECGI Methodology)

1. Rudy Y, Ramanathan C, Ghosh S. Noninvasive Electrocardiographic Imaging: Methodology and Excitation of the Normal Human Heart. In: Cardiac Electrophysiology: From Cell to Bedside. 2009. p. 467–472.
2. Rudy Y, Burnes JE. Noninvasive Electrocardiographic Imaging. *Ann Noninvasive Electrocardiol.* 1999;4:340–359.
3. Rudy Y, Oster HS. The electrocardiographic inverse problem. *Critical reviews in biomedical engineering.* 1992;20:25–45.
4. Ghosh S, Rudy Y. Accuracy of quadratic versus linear interpolation in noninvasive Electrocardiographic Imaging (ECGI). *Annals of biomedical engineering.* 2005;33:1187–1201.
5. Wang Y, Rudy Y. Application of the method of fundamental solutions to potential-based inverse electrocardiography. *Annals of biomedical engineering.* 2006;34:1272–1288.
6. Ramanathan C, Jia P, Ghanem R, Calvetti D, Rudy Y. Noninvasive electrocardiographic imaging (ECGI): application of the generalized minimal residual (GMRes) method. *Annals of biomedical engineering.* 2003;31:981–994.
7. Ghosh S, Rudy Y. Application of L1-norm regularization to epicardial potential solution of the inverse electrocardiography problem. *Annals of biomedical engineering.* 2009;37:902–912.
